# Supplementary material for: Multiple Single Nucleotide Polymorphism Testing Improves the Prediction of Diabetic Retinopathy Risk with Type 2 Diabetes Mellitus
Source: MDPI journal article supplement (doi:10.3390/jpm11080689), 2021-07-21
Supplement: s1 [file s1]

**Table S1.** Multiple analysis of SNPs on DR risk with logistic regression using enter method

|                                  |              | OR (95% CI)           |
|----------------------------------|--------------|-----------------------|
| CDKAL1 (rs10946398)              | CC+CA vs. AA | 1.237 (0.711, 2.153)  |
| CDKN2A (rs10811661)              | CC+CT vs. TT | 0.948 (0.649, 1.384)  |
| FTO (rs8050136)                  | CC+CA vs. AA | 5.617 (1.090, 28.950) |
| HHEX (rs1111875)                 | AA+AG vs. GG | 0.956 (0.542, 1.689)  |
| IGF2BP2 (rs4402960)              | GG+GT vs. TT | 0.867 (0.409, 1.836)  |
| IRS1 (rs2943641)                 | TT+TC vs. CC | 0.900 (0.504, 1.607)  |
| KCNJ11 (rs5219)                  | CC+CT vs. TT | 1.515 (0.898, 2.558)  |
| SLC22A1 (rs622342)               | CC+CA vs. AA | 1.706 (0.566, 5.142)  |
| TCF7L2 (7901695)                 | CC+CT vs. TT | 1.491 (0.641, 3.467)  |
| KCNQ1 (rs2237892)                | TT+TC vs. CC | 1.145 (0.787, 1.665)  |
| VPS13C/C2CD4A/C2CD4B (rs7172432) | GG+GA vs. AA | 0.931 (0.639, 1.357)  |
| SLC30A8 (rs1326634)              | TT+TC vs. CC | 0.867 (0.580, 1.297)  |
| PSMD6 (rs831571)                 | TT+TC vs. CC | 1.562 (1.064, 2.294)  |

Genetic variables adjusted for waist circumference, SBP, duration of DM, albuminuria categories, HbA1c, total cholesterol, high-density lipoprotein, low-density lipoprotein, triglycerides. OR: odds ratio; CI: confidence interval; vs.: versus.
